# Supplementary material for: The murine catecholamine methyltransferase mTOMT is essential for mechanotransduction by cochlear hair cells
Source: eLife journal article supplement (doi:10.7554/elife.24318), 2017-05-15

# Figure 8 - Supplement 1

A

MYC-TMC2 Phalloidin

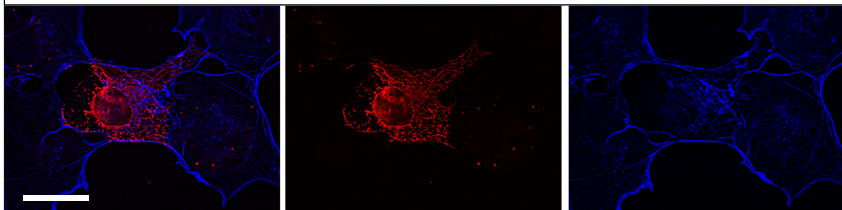

B

TOMT-GFP MYC-TMC2 Phalloidin

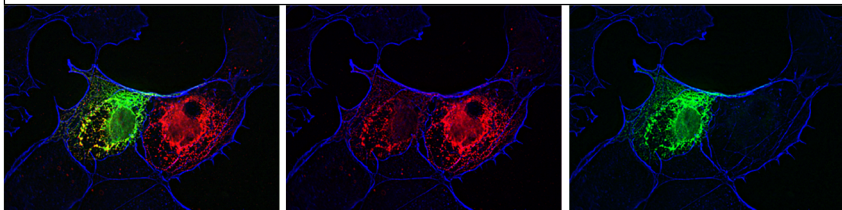

C

HA-TOMT MYC-TMC2 Phalloidin

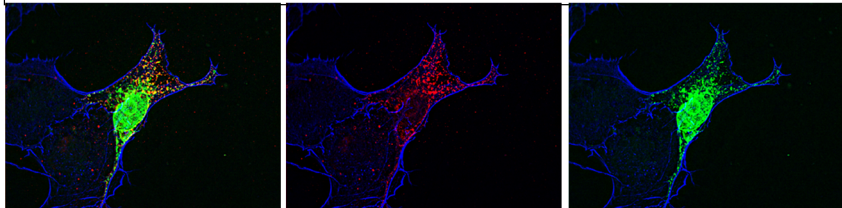

Supplement: supp [file elife-24318-supp-v1.zip]
