# Supplementary figures and images for: The murine catecholamine methyltransferase mTOMT is essential for mechanotransduction by cochlear hair cells
Source: eLife journal article supplement (doi:10.7554/elife.24318), 2017-05-15

# Figure 6 - Supplement 1

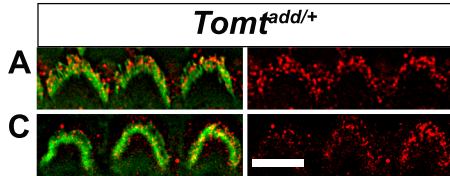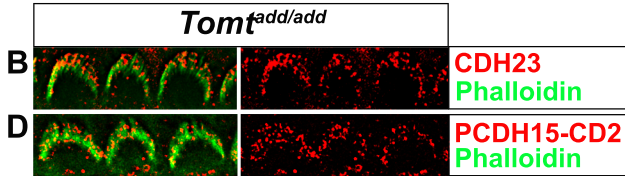

Supplement: supp [file elife-24318-supp-v1.zip]

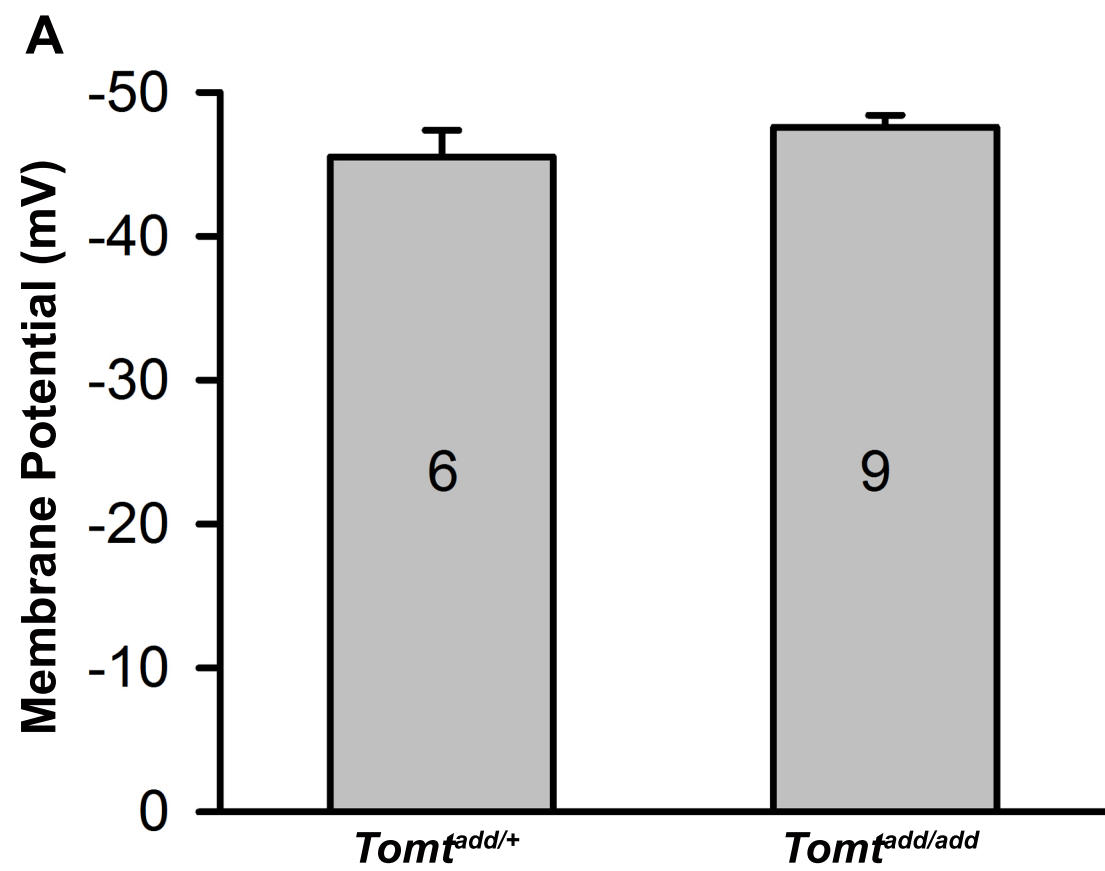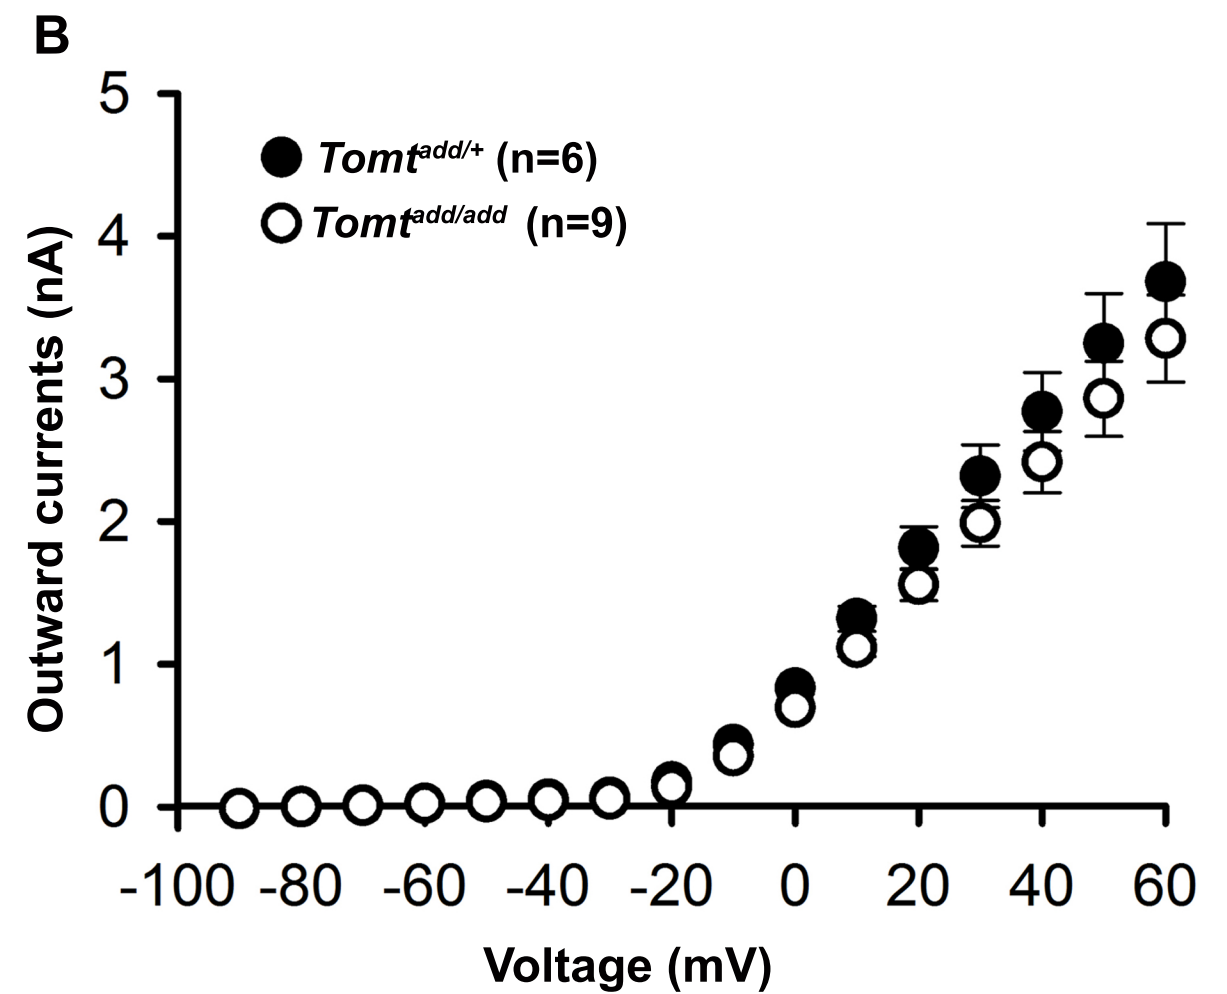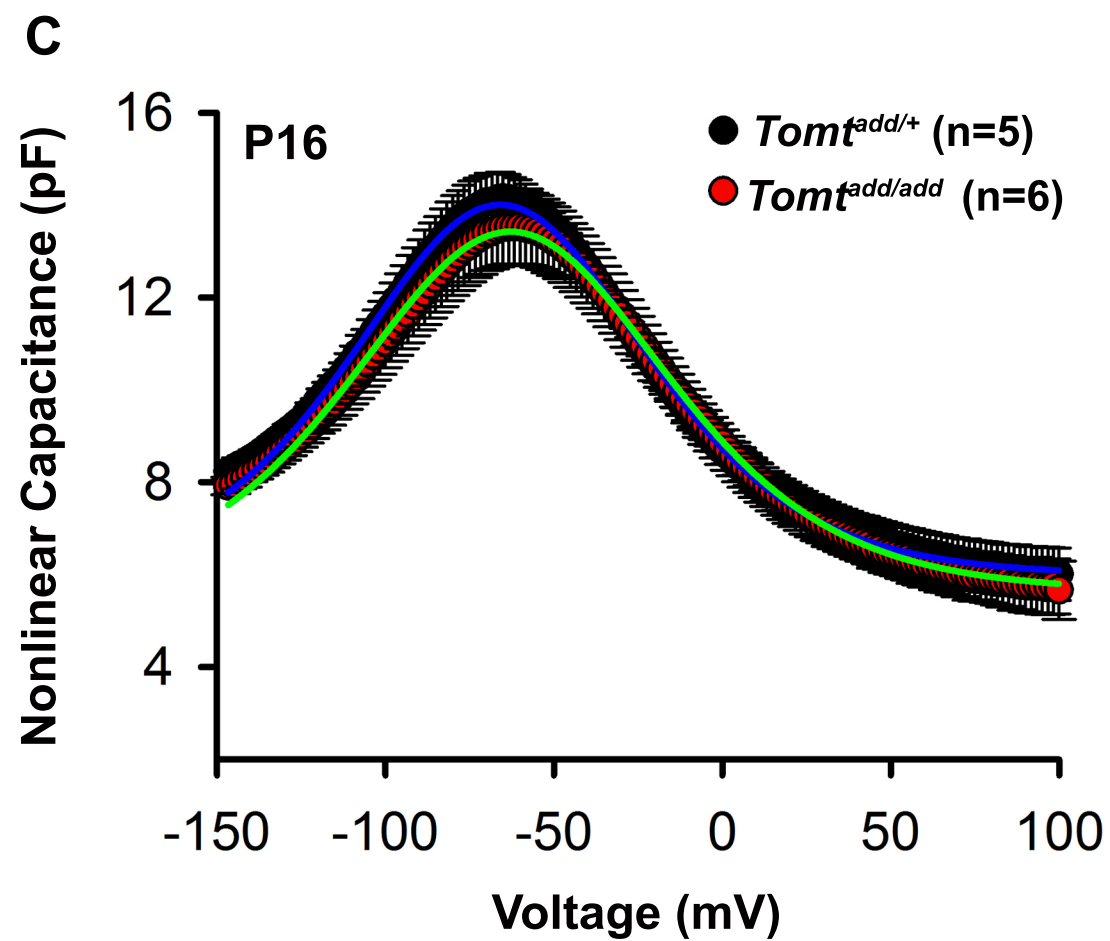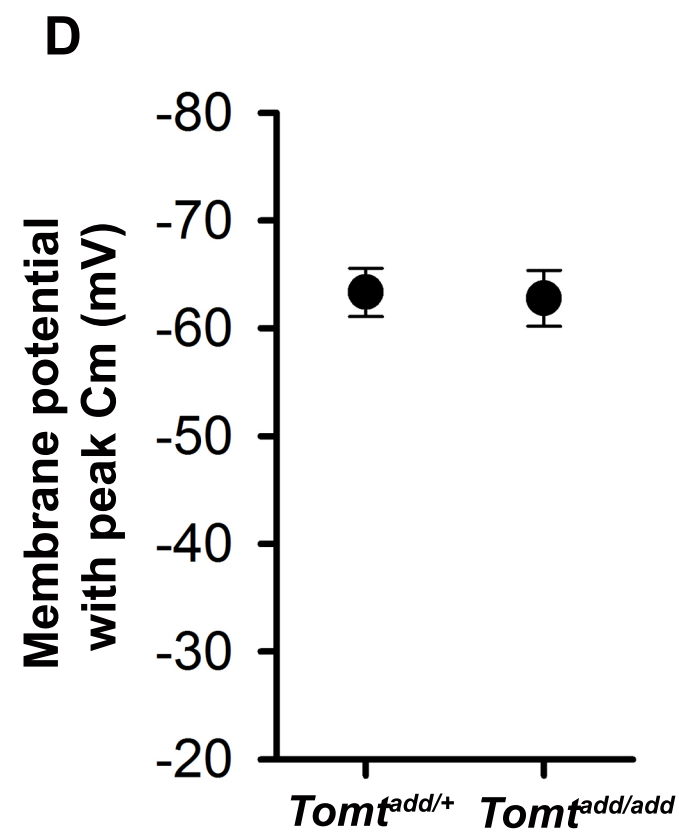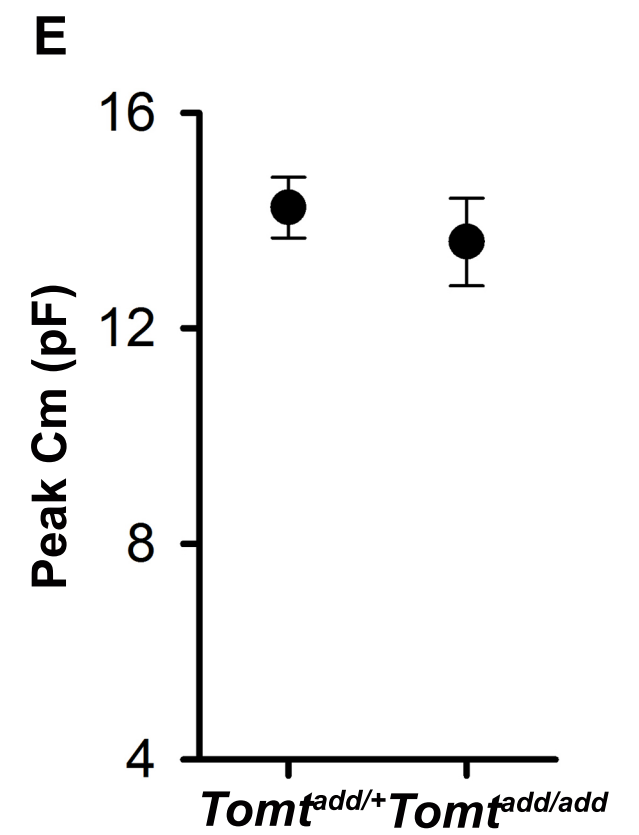

Supplement: supp [file elife-24318-supp-v1.zip]

**A**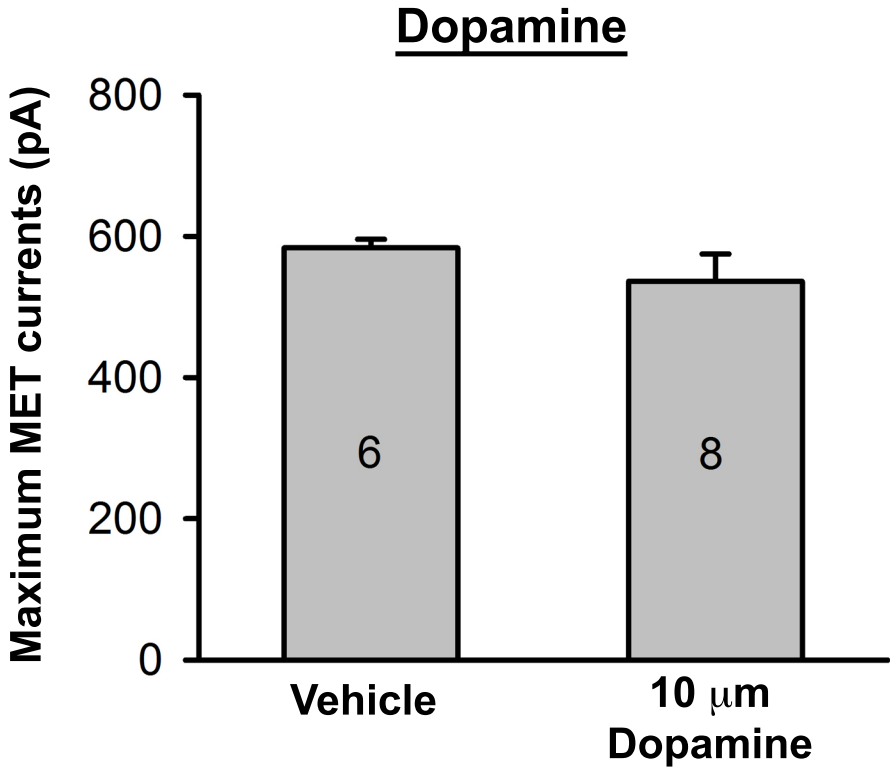**B**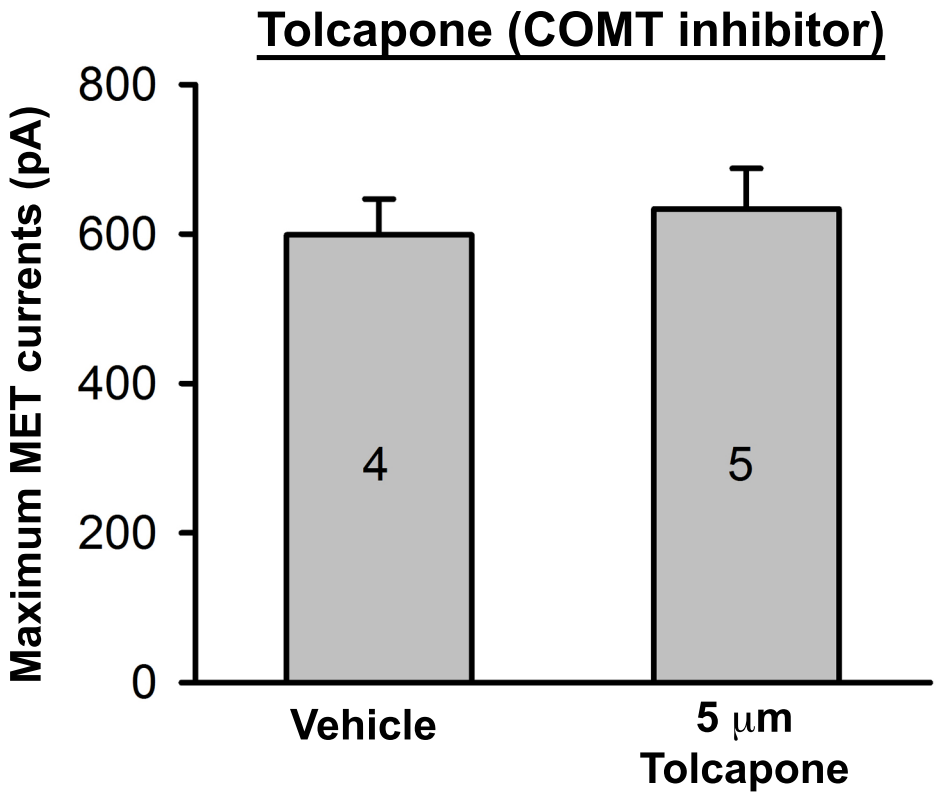

Supplement: supp [file elife-24318-supp-v1.zip]

Figure 7 - Supplement 2

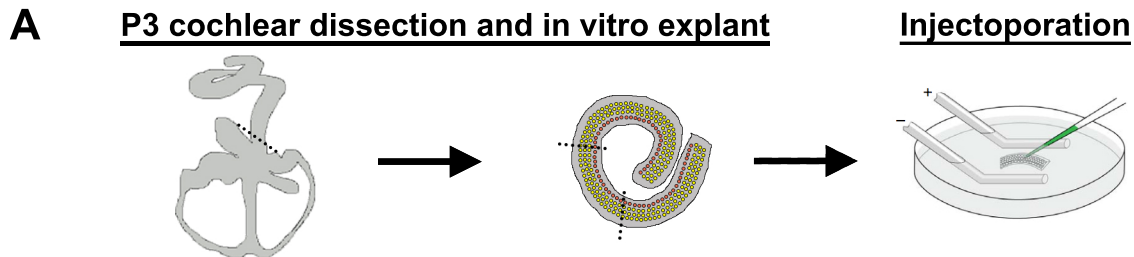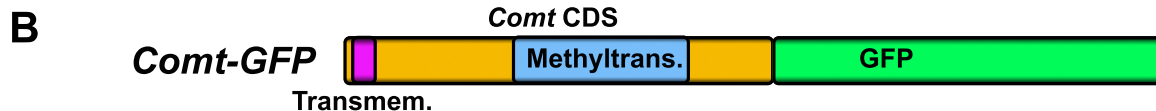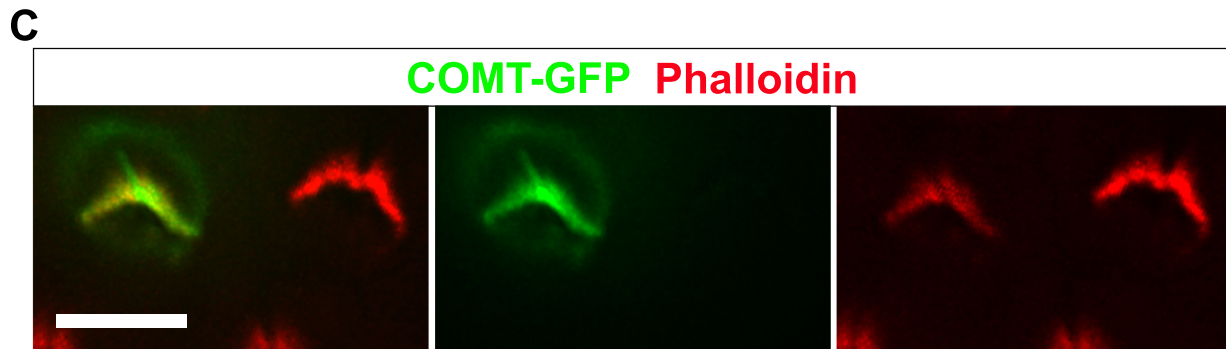

Supplement: supp [file elife-24318-supp-v1.zip]

Figure 3 - Supplement 1

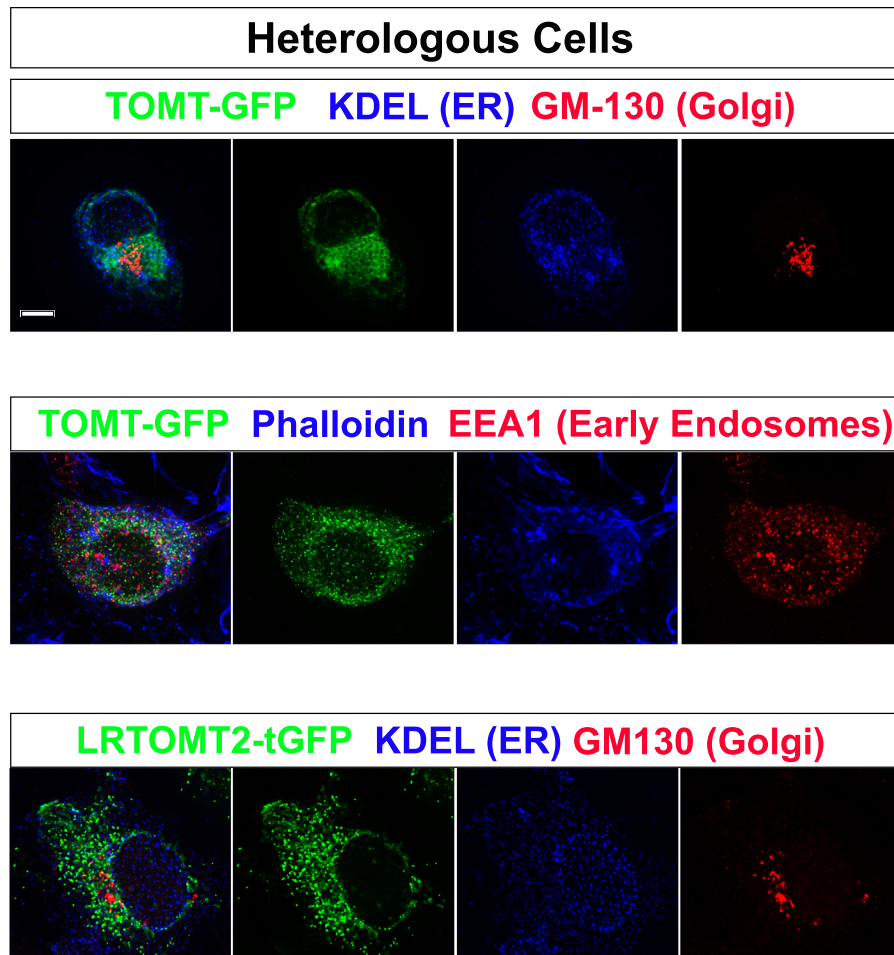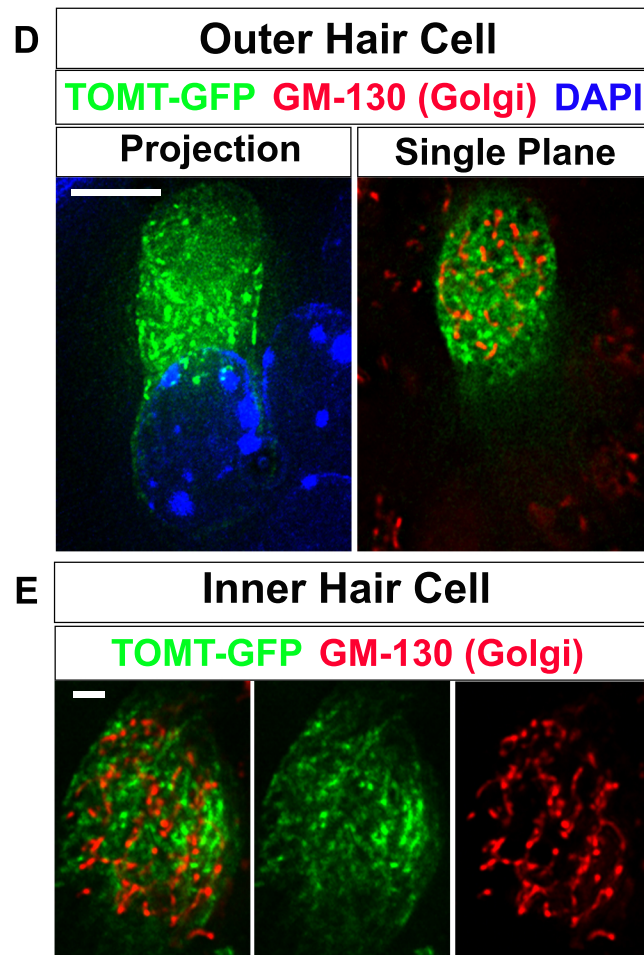

Supplement: supp [file elife-24318-supp-v1.zip]
